# Supplementary material for: Women 1.5 Times More Likely to Leave STEM Pipeline after Calculus Compared to Men: Lack of Mathematical Confidence a Potential Culprit
Source: PubMed Central journal article supplement (PMC4943602; doi:10.1371/journal.pone.0157447), 2016-07-13
Supplement: pone.0157447.s006.pdf [file pone.0157447.s006.pdf]

**S1 Table. Switcher coding dictionary outlining student responses to the four questions regarding intention to take Calculus II and their coding as a Switcher or Persister.**

| Switcher Group  | Number of Students | Beginning of term | End of term; reflect | End of term | Follow up |
|-----------------|--------------------|-------------------|----------------------|-------------|-----------|
| 1               | 160                | Y                 |                      |             | N         |
| 2               | 118                | M                 |                      |             | N         |
| 3               | 15                 | NA                | Y                    |             | N         |
| 4               | 3                  | NA                | M                    |             | N         |
| 5               | 38                 | Y                 | Y                    | M           | NA        |
| 6               | 123                | Y                 |                      | N           | NA        |
| 7               | 17                 | M                 | Y                    | M           | NA        |
| 8               | 152                | M                 |                      | N           | NA        |
| 9               | 34                 | NA                | Y                    | M           | NA        |
| 10              | 78                 | NA                | Y                    | N           | NA        |
| 11              | 65                 | NA                | M                    | N           | NA        |
| Persister Group | Number of Students | Beginning of term | End of term; reflect | End of term | Follow up |
| 12              | 586                | Y                 |                      |             | Y         |
| 13              | 63                 | M                 |                      |             | Y         |
| 14              | 67                 | NA                | Y                    |             | Y         |
| 15              | 2                  | NA                | M                    |             | Y         |
| 16              | 1543               | Y                 |                      | Y           | NA        |
| 17              | 35                 | Y                 | M                    | M           | NA        |
| 18              | 5                  | Y                 | N                    | M           | NA        |
| 19              | 1                  | Y                 | NA                   | M           | NA        |
| 20              | 193                | M                 |                      | Y           | NA        |
| 21              | 64                 | M                 | M                    | M           | NA        |
| 22              | 22                 | M                 | N                    | YM          | NA        |
| 23              | 3                  | M                 | NA                   | M           | NA        |
| 24              | 1325               | NA                | Y                    | Y           | NA        |
| 25              | 53                 | NA                | M                    | Y           | NA        |
| 26              | 103                | NA                | M                    | M           | NA        |
