# Supplementary material for: Women 1.5 Times More Likely to Leave STEM Pipeline after Calculus Compared to Men: Lack of Mathematical Confidence a Potential Culprit
Source: PubMed Central journal article supplement (PMC4943602; doi:10.1371/journal.pone.0157447), 2016-07-13
Supplement: pone.0157447.s007.pdf [file pone.0157447.s007.pdf]

**S2 Table. Career choice groupings based on beginning of term survey responses.**

| Group                                                   | Coding | Original indicated career choice                    |
|---------------------------------------------------------|--------|-----------------------------------------------------|
| STM<br>(traditional STEM fields, excluding engineering) | 1      | Life scientist (e.g. biologist, medical researcher) |
|                                                         | 1      | Earth/environmental scientist (e.g. geologist)      |
|                                                         | 1      | Physical scientist (e.g. chemist, physicist)        |
|                                                         | 1      | Computer scientist, IT                              |
|                                                         | 1      | Mathematician                                       |
|                                                         | 1      | Science/math teacher                                |
| Engineering                                             | 2      | Engineer                                            |
| Pre-med                                                 | 3      | Medical professional (e.g. doctor, dentist)         |
|                                                         | 3      | Other health professional (e.g. nurse, technician)  |
| Non-STEM                                                | 4      | Other teacher                                       |
|                                                         | 4      | Social scientist (e.g. psychologist, sociologist)   |
|                                                         | 4      | Business administration (e.g. finance, management)  |
|                                                         | 4      | Lawyer                                              |
|                                                         | 4      | English/language/arts specialist                    |
| Undecided                                               | 4      | Other non-science related career                    |
|                                                         | 5      | Undecided                                           |
