# Supplementary material for: Women 1.5 Times More Likely to Leave STEM Pipeline after Calculus Compared to Men: Lack of Mathematical Confidence a Potential Culprit
Source: PubMed Central journal article supplement (PMC4943602; doi:10.1371/journal.pone.0157447), 2016-07-13
Supplement: pone.0157447.s013.pdf [file pone.0157447.s013.pdf]

**S8 Table. Percentage of students that switched out of calculus by aggregate measures of instruction perception and gender.**

| Instructor Quality Response | Gender | N   | Switcher % | Student-Centered Instruction Response | Gender | N   | Switcher % |
|-----------------------------|--------|-----|------------|---------------------------------------|--------|-----|------------|
| [5.5, 6]                    | Male   | 165 | 9.1        | [5.5, 6]                              | Male   | 17  | 17.6       |
|                             | Female | 152 | 16.4       |                                       | Female | 21  | 38.1       |
| [4.5, 5.5)                  | Male   | 613 | 12.2       | [4.5, 5.5)                            | Male   | 155 | 12.3       |
|                             | Female | 464 | 20.3       |                                       | Female | 124 | 25.0       |
| [3.5, 4.5)                  | Male   | 323 | 13.6       | [3.5, 4.5)                            | Male   | 363 | 12.1       |
|                             | Female | 281 | 25.3       |                                       | Female | 282 | 22.0       |
| [2.5, 3.5)                  | Male   | 95  | 24.2       | [2.5, 3.5)                            | Male   | 393 | 16.3       |
|                             | Female | 89  | 29.2       |                                       | Female | 296 | 23.6       |
| [1.5, 2.5)                  | Male   | 33  | 24.2       | [1.5, 2.5)                            | Male   | 252 | 11.1       |
|                             | Female | 37  | 48.6       |                                       | Female | 257 | 23.0       |
| [1, 1.5)                    | Male   | 7   | 14.3       | [1, 1.5)                              | Male   | 56  | 14.3       |
|                             | Female | 7   | 57.1       |                                       | Female | 50  | 16.0       |
