# Supplementary material for: Women 1.5 Times More Likely to Leave STEM Pipeline after Calculus Compared to Men: Lack of Mathematical Confidence a Potential Culprit
Source: PLoS One. 2016 Jul 13;11(7):e0157447. doi: 10.1371/journal.pone.0157447 (PMC4943602; doi:10.1371/journal.pone.0157447)
Supplement: S1 Fig — (PDF) [file pone.0157447.s001.pdf]

**18. My Calculus instructor:**

[illegible]

**19. During class time, how frequently did your instructor:**

[illegible]
