# Supplementary material for: Women 1.5 Times More Likely to Leave STEM Pipeline after Calculus Compared to Men: Lack of Mathematical Confidence a Potential Culprit
Source: PLOS journal article supplement (doi:10.1371/journal.pone.0157447), 2016-07-13
Supplement: S8 (10.1371/journal.pone.0157447.s008) [file journal.pone.0157447.s008]

**S3 Table. Principal components analysis results for questions related to Instructor Quality.** Students were asked to respond to each question on a scale from 1-6, where 1 indicated strongly disagree and 6 indicated strongly agree. The PCA loadings were rescaled to sum to one so that the aggregate variable would range between 1 and 6 like the original questions. \*Since the original PCA loading was negative, the last question regarding discouragement to continue in calculus was reverse coded so 1 represents strongly agree and 6 represents strongly disagree.

| Question 18 - My calculus instructor:                                 | PCA loadings | Rescaled PCA loadings |
|-----------------------------------------------------------------------|--------------|-----------------------|
| Asked questions to determine if I understood what was being discussed | 0.366        | 0.131                 |
| Listened carefully to my questions and comments                       | 0.364        | 0.131                 |
| Discussed applications of calculus                                    | 0.305        | 0.110                 |
| Allowed time for me to understand difficult ideas                     | 0.414        | 0.149                 |
| Helped me become a better problem solver                              | 0.410        | 0.147                 |
| Provided explanations that were understandable                        | 0.409        | 0.147                 |
| Was available to make appointments outside of office hours, if needed | 0.229        | 0.082                 |
| Discouraged me from wanting to continue taking calculus*              | 0.286        | 0.103                 |
