# Supplementary material for: Women 1.5 Times More Likely to Leave STEM Pipeline after Calculus Compared to Men: Lack of Mathematical Confidence a Potential Culprit
Source: PLOS journal article supplement (doi:10.1371/journal.pone.0157447), 2016-07-13
Supplement: S9 (10.1371/journal.pone.0157447.s009) [file journal.pone.0157447.s009]

**S4 Table. Principal components analysis results for questions related to Student-Centered Practices.** Students were asked to respond to each question on a scale from 1-6, where 1 indicated not at all and 6 indicated very often. The PCA loadings were rescaled to sum to one so that the aggregate variable would range between 1 and 6 like the original questions. \*Since the original PCA loading was negative, the lecture question was reverse coded so 1 represents very often and 6 represents not at all.

| <b>Question 19</b> - During class time, how frequently did your instructor: | PCA loadings | Rescaled PCA loadings |
|-----------------------------------------------------------------------------|--------------|-----------------------|
| Show how to work specific problems?                                         | 0.095        | 0.038                 |
| Have students work with one another?                                        | 0.501        | 0.201                 |
| Hold a whole-class discussion?                                              | 0.507        | 0.203                 |
| Have students give presentations?                                           | 0.257        | 0.103                 |
| Have students work individually on problems or tasks?                       | 0.373        | 0.149                 |
| Lecture?*                                                                   | 0.051        | 0.021                 |
| Ask questions?                                                              | 0.252        | 0.101                 |
| Ask students to explain their thinking?                                     | 0.460        | 0.184                 |
