# Supplementary material for: Women 1.5 Times More Likely to Leave STEM Pipeline after Calculus Compared to Men: Lack of Mathematical Confidence a Potential Culprit
Source: PLOS journal article supplement (doi:10.1371/journal.pone.0157447), 2016-07-13
Supplement: S10 (10.1371/journal.pone.0157447.s010) [file journal.pone.0157447.s010]

**S5 Table. Percentage of students that switched out of calculus by career choice and gender.**

| Career choice | Gender | N   | Switcher % |
|---------------|--------|-----|------------|
| STM           | Male   | 263 | 10.6       |
|               | Female | 223 | 16.1       |
| Engineering   | Male   | 539 | 3.5        |
|               | Female | 249 | 6.4        |
| Pre-med       | Male   | 199 | 21.6       |
|               | Female | 318 | 33.3       |
| Non-STEM      | Male   | 136 | 36.8       |
|               | Female | 126 | 38.1       |
| Undecided     | Male   | 99  | 26.3       |
|               | Female | 114 | 28.1       |
