# Supplementary material for: Women 1.5 Times More Likely to Leave STEM Pipeline after Calculus Compared to Men: Lack of Mathematical Confidence a Potential Culprit
Source: PLOS journal article supplement (doi:10.1371/journal.pone.0157447), 2016-07-13
Supplement: S11 (10.1371/journal.pone.0157447.s011) [file journal.pone.0157447.s011]

**S6 Table. Percentage of students that switched out of calculus by previous calculus experience and gender.**

| Previous Calculus | Gender | N   | Switcher % |
|-------------------|--------|-----|------------|
| High School       | Male   | 740 | 13.0       |
|                   | Female | 699 | 21.7       |
| College           | Male   | 99  | 17.2       |
|                   | Female | 62  | 14.5       |
| None              | Male   | 397 | 13.4       |
|                   | Female | 269 | 28.6       |
