# Supplementary material for: Women 1.5 Times More Likely to Leave STEM Pipeline after Calculus Compared to Men: Lack of Mathematical Confidence a Potential Culprit
Source: PLOS journal article supplement (doi:10.1371/journal.pone.0157447), 2016-07-13
Supplement: S12 (10.1371/journal.pone.0157447.s012) [file journal.pone.0157447.s012]

**S7 Table. Percentage of students that switched out of calculus by standardized mathematics test percentile and gender.**

| Test Percentile | Gender | N   | Switcher % | Test Percentile | Gender | N  | Switcher % |
|-----------------|--------|-----|------------|-----------------|--------|----|------------|
| 90-100          | Male   | 711 | 12.4       | 40-49           | Male   | 22 | 18.2       |
|                 | Female | 527 | 23.0       |                 | Female | 33 | 24.2       |
| 80-89           | Male   | 247 | 15.0       | 30-39           | Male   | 8  | 12.5       |
|                 | Female | 216 | 20.8       |                 | Female | 4  | 50.0       |
| 70-79           | Male   | 164 | 12.8       | 20-29           | Male   | 3  | 0.0        |
|                 | Female | 157 | 26.1       |                 | Female | 1  | 0.0        |
| 60-69           | Male   | 50  | 16.0       | 10-19           | Male   | 2  | 50.0       |
|                 | Female | 60  | 18.3       |                 | Female | 2  | 50.0       |
| 50-59           | Male   | 26  | 23.1       | 0-9             | Male   | 3  | 0.0        |
|                 | Female | 29  | 27.6       |                 | Female | 1  | 100.0      |
